# Supplementary material for: The “D2P” Approach: Digitalisation, Production and Performance in the Standardised Sustainable Deep Renovation of Buildings
Source: MDPI journal article supplement (doi:10.3390/en15186689), 2022-09-13
Supplement: s1 [file s1]

| Efficiency Solutions Matrix Applicable On National Residential Building Stock |                                                          |                                            |                                            |              |      |              |                                            |                                            |              |          |                      |        |                              |                   |                  |                                                  |         |                 |  |                                   |                                              |  |  |  |  |  |  |  |  |                                                |  |  |  |  |                |  |  |  |  |  |  |  |  |  |  |  |  |  |  |  |  |  |  |  |  |  |  |  |  |  |  |  |  |  |  |  |  |  |  |  |  |  |  |  |  |  |  |  |  |  |  |  |  |  |  |  |  |  |  |  |  |  |  |  |  |  |  |  |  |  |  |  |  |  |  |  |  |  |  |  |  |  |  |  |  |  |  |  |  |  |  |  |  |  |  |  |  |  |  |  |  |  |  |  |  |  |  |  |  |  |  |  |  |  |  |  |  |  |  |  |  |  |  |  |  |  |  |  |  |  |  |  |  |  |  |  |  |  |  |  |  |  |  |  |  |  |  |  |  |  |  |  |  |  |  |  |  |  |  |  |  |  |  |  |  |  |  |  |  |  |  |  |  |  |  |  |  |  |  |  |  |  |  |  |  |  |  |  |  |  |  |  |  |  |  |  |  |  |  |  |  |  |  |  |  |  |  |  |  |  |  |  |  |  |  |  |  |  |  |  |  |  |  |  |  |  |  |  |  |  |  |  |  |  |  |  |  |  |  |  |  |  |  |  |  |  |  |  |  |  |  |  |  |  |  |  |  |  |  |  |  |  |  |  |  |  |  |  |  |  |  |  |  |  |  |  |  |  |  |  |  |  |  |  |  |  |  |  |  |  |  |  |  |  |  |  |  |  |  |  |  |  |  |  |  |  |  |  |  |  |  |  |  |  |  |  |  |  |  |  |  |  |  |  |  |  |  |  |  |  |  |  |  |  |  |  |  |  |  |  |  |  |  |  |  |  |  |  |  |  |  |  |  |  |  |  |  |  |  |  |  |  |  |  |  |  |  |  |  |  |  |  |  |  |  |  |  |  |  |  |  |  |  |  |  |  |  |  |  |  |  |  |  |  |  |  |  |  |  |  |  |  |  |  |  |  |  |  |  |  |  |  |  |  |  |  |  |  |  |  |  |  |  |  |  |  |  |  |  |  |  |  |  |  |  |  |  |  |  |  |  |  |  |  |  |  |  |  |  |  |  |  |  |  |  |  |  |  |  |  |  |  |  |  |  |  |  |  |  |  |  |  |  |  |  |  |  |  |  |  |  |  |  |  |  |  |  |  |  |  |  |  |  |  |  |  |  |  |  |  |  |  |  |  |  |  |  |  |  |  |  |  |  |  |  |  |  |  |  |  |  |  |  |  |
|-------------------------------------------------------------------------------|----------------------------------------------------------|--------------------------------------------|--------------------------------------------|--------------|------|--------------|--------------------------------------------|--------------------------------------------|--------------|----------|----------------------|--------|------------------------------|-------------------|------------------|--------------------------------------------------|---------|-----------------|--|-----------------------------------|----------------------------------------------|--|--|--|--|--|--|--|--|------------------------------------------------|--|--|--|--|----------------|--|--|--|--|--|--|--|--|--|--|--|--|--|--|--|--|--|--|--|--|--|--|--|--|--|--|--|--|--|--|--|--|--|--|--|--|--|--|--|--|--|--|--|--|--|--|--|--|--|--|--|--|--|--|--|--|--|--|--|--|--|--|--|--|--|--|--|--|--|--|--|--|--|--|--|--|--|--|--|--|--|--|--|--|--|--|--|--|--|--|--|--|--|--|--|--|--|--|--|--|--|--|--|--|--|--|--|--|--|--|--|--|--|--|--|--|--|--|--|--|--|--|--|--|--|--|--|--|--|--|--|--|--|--|--|--|--|--|--|--|--|--|--|--|--|--|--|--|--|--|--|--|--|--|--|--|--|--|--|--|--|--|--|--|--|--|--|--|--|--|--|--|--|--|--|--|--|--|--|--|--|--|--|--|--|--|--|--|--|--|--|--|--|--|--|--|--|--|--|--|--|--|--|--|--|--|--|--|--|--|--|--|--|--|--|--|--|--|--|--|--|--|--|--|--|--|--|--|--|--|--|--|--|--|--|--|--|--|--|--|--|--|--|--|--|--|--|--|--|--|--|--|--|--|--|--|--|--|--|--|--|--|--|--|--|--|--|--|--|--|--|--|--|--|--|--|--|--|--|--|--|--|--|--|--|--|--|--|--|--|--|--|--|--|--|--|--|--|--|--|--|--|--|--|--|--|--|--|--|--|--|--|--|--|--|--|--|--|--|--|--|--|--|--|--|--|--|--|--|--|--|--|--|--|--|--|--|--|--|--|--|--|--|--|--|--|--|--|--|--|--|--|--|--|--|--|--|--|--|--|--|--|--|--|--|--|--|--|--|--|--|--|--|--|--|--|--|--|--|--|--|--|--|--|--|--|--|--|--|--|--|--|--|--|--|--|--|--|--|--|--|--|--|--|--|--|--|--|--|--|--|--|--|--|--|--|--|--|--|--|--|--|--|--|--|--|--|--|--|--|--|--|--|--|--|--|--|--|--|--|--|--|--|--|--|--|--|--|--|--|--|--|--|--|--|--|--|--|--|--|--|--|--|--|--|--|--|--|--|--|--|--|--|--|--|--|--|--|--|--|--|--|--|--|--|--|--|--|--|--|--|--|--|--|--|--|--|--|--|--|--|--|--|--|--|--|--|--|--|--|--|--|--|--|--|--|--|--|--|
| N. Sheet                                                                      | Class of construction age                                |                                            |                                            |              |      |              |                                            | Building type                              |              |          |                      |        |                              | Construction type |                  |                                                  |         |                 |  | Building envelope characteristics |                                              |  |  |  |  |  |  |  |  | Limit values verification by current standards |  |  |  |  |                |  |  |  |  |  |  |  |  |  |  |  |  |  |  |  |  |  |  |  |  |  |  |  |  |  |  |  |  |  |  |  |  |  |  |  |  |  |  |  |  |  |  |  |  |  |  |  |  |  |  |  |  |  |  |  |  |  |  |  |  |  |  |  |  |  |  |  |  |  |  |  |  |  |  |  |  |  |  |  |  |  |  |  |  |  |  |  |  |  |  |  |  |  |  |  |  |  |  |  |  |  |  |  |  |  |  |  |  |  |  |  |  |  |  |  |  |  |  |  |  |  |  |  |  |  |  |  |  |  |  |  |  |  |  |  |  |  |  |  |  |  |  |  |  |  |  |  |  |  |  |  |  |  |  |  |  |  |  |  |  |  |  |  |  |  |  |  |  |  |  |  |  |  |  |  |  |  |  |  |  |  |  |  |  |  |  |  |  |  |  |  |  |  |  |  |  |  |  |  |  |  |  |  |  |  |  |  |  |  |  |  |  |  |  |  |  |  |  |  |  |  |  |  |  |  |  |  |  |  |  |  |  |  |  |  |  |  |  |  |  |  |  |  |  |  |  |  |  |  |  |  |  |  |  |  |  |  |  |  |  |  |  |  |  |  |  |  |  |  |  |  |  |  |  |  |  |  |  |  |  |  |  |  |  |  |  |  |  |  |  |  |  |  |  |  |  |  |  |  |  |  |  |  |  |  |  |  |  |  |  |  |  |  |  |  |  |  |  |  |  |  |  |  |  |  |  |  |  |  |  |  |  |  |  |  |  |  |  |  |  |  |  |  |  |  |  |  |  |  |  |  |  |  |  |  |  |  |  |  |  |  |  |  |  |  |  |  |  |  |  |  |  |  |  |  |  |  |  |  |  |  |  |  |  |  |  |  |  |  |  |  |  |  |  |  |  |  |  |  |  |  |  |  |  |  |  |  |  |  |  |  |  |  |  |  |  |  |  |  |  |  |  |  |  |  |  |  |  |  |  |  |  |  |  |  |  |  |  |  |  |  |  |  |  |  |  |  |  |  |  |  |  |  |  |  |  |  |  |  |  |  |  |  |  |  |  |  |  |  |  |  |  |  |  |  |  |  |  |  |  |  |  |  |  |  |  |  |  |  |  |  |  |  |  |  |  |  |  |  |  |  |  |  |  |  |  |  |  |  |  |  |  |  |  |  |  |  |  |  |
|                                                                               |                                                          |                                            |                                            |              |      |              |                                            |                                            |              |          |                      |        |                              |                   |                  |                                                  |         |                 |  |                                   |                                              |  |  |  |  |  |  |  |  | Winter regimen                                 |  |  |  |  | Summer regimen |  |  |  |  |  |  |  |  |  |  |  |  |  |  |  |  |  |  |  |  |  |  |  |  |  |  |  |  |  |  |  |  |  |  |  |  |  |  |  |  |  |  |  |  |  |  |  |  |  |  |  |  |  |  |  |  |  |  |  |  |  |  |  |  |  |  |  |  |  |  |  |  |  |  |  |  |  |  |  |  |  |  |  |  |  |  |  |  |  |  |  |  |  |  |  |  |  |  |  |  |  |  |  |  |  |  |  |  |  |  |  |  |  |  |  |  |  |  |  |  |  |  |  |  |  |  |  |  |  |  |  |  |  |  |  |  |  |  |  |  |  |  |  |  |  |  |  |  |  |  |  |  |  |  |  |  |  |  |  |  |  |  |  |  |  |  |  |  |  |  |  |  |  |  |  |  |  |  |  |  |  |  |  |  |  |  |  |  |  |  |  |  |  |  |  |  |  |  |  |  |  |  |  |  |  |  |  |  |  |  |  |  |  |  |  |  |  |  |  |  |  |  |  |  |  |  |  |  |  |  |  |  |  |  |  |  |  |  |  |  |  |  |  |  |  |  |  |  |  |  |  |  |  |  |  |  |  |  |  |  |  |  |  |  |  |  |  |  |  |  |  |  |  |  |  |  |  |  |  |  |  |  |  |  |  |  |  |  |  |  |  |  |  |  |  |  |  |  |  |  |  |  |  |  |  |  |  |  |  |  |  |  |  |  |  |  |  |  |  |  |  |  |  |  |  |  |  |  |  |  |  |  |  |  |  |  |  |  |  |  |  |  |  |  |  |  |  |  |  |  |  |  |  |  |  |  |  |  |  |  |  |  |  |  |  |  |  |  |  |  |  |  |  |  |  |  |  |  |  |  |  |  |  |  |  |  |  |  |  |  |  |  |  |  |  |  |  |  |  |  |  |  |  |  |  |  |  |  |  |  |  |  |  |  |  |  |  |  |  |  |  |  |  |  |  |  |  |  |  |  |  |  |  |  |  |  |  |  |  |  |  |  |  |  |  |  |  |  |  |  |  |  |  |  |  |  |  |  |  |  |  |  |  |  |  |  |  |  |  |  |  |  |  |  |  |  |  |  |  |  |  |  |  |  |  |  |  |  |  |  |  |  |  |  |  |  |  |  |  |  |  |  |  |  |  |  |  |  |  |  |  |  |  |  |  |  |  |  |  |
|                                                                               | Vertical closures of national residential building stock |                                            |                                            |              |      |              |                                            |                                            |              |          | Efficiency solutions |        | Vertical closure Post operam |                   |                  | Climate zones applicability Limit values [W/m²K] |         |                 |  |                                   | Satisfying quality and performance standards |  |  |  |  |  |  |  |  |                                                |  |  |  |  |                |  |  |  |  |  |  |  |  |  |  |  |  |  |  |  |  |  |  |  |  |  |  |  |  |  |  |  |  |  |  |  |  |  |  |  |  |  |  |  |  |  |  |  |  |  |  |  |  |  |  |  |  |  |  |  |  |  |  |  |  |  |  |  |  |  |  |  |  |  |  |  |  |  |  |  |  |  |  |  |  |  |  |  |  |  |  |  |  |  |  |  |  |  |  |  |  |  |  |  |  |  |  |  |  |  |  |  |  |  |  |  |  |  |  |  |  |  |  |  |  |  |  |  |  |  |  |  |  |  |  |  |  |  |  |  |  |  |  |  |  |  |  |  |  |  |  |  |  |  |  |  |  |  |  |  |  |  |  |  |  |  |  |  |  |  |  |  |  |  |  |  |  |  |  |  |  |  |  |  |  |  |  |  |  |  |  |  |  |  |  |  |  |  |  |  |  |  |  |  |  |  |  |  |  |  |  |  |  |  |  |  |  |  |  |  |  |  |  |  |  |  |  |  |  |  |  |  |  |  |  |  |  |  |  |  |  |  |  |  |  |  |  |  |  |  |  |  |  |  |  |  |  |  |  |  |  |  |  |  |  |  |  |  |  |  |  |  |  |  |  |  |  |  |  |  |  |  |  |  |  |  |  |  |  |  |  |  |  |  |  |  |  |  |  |  |  |  |  |  |  |  |  |  |  |  |  |  |  |  |  |  |  |  |  |  |  |  |  |  |  |  |  |  |  |  |  |  |  |  |  |  |  |  |  |  |  |  |  |  |  |  |  |  |  |  |  |  |  |  |  |  |  |  |  |  |  |  |  |  |  |  |  |  |  |  |  |  |  |  |  |  |  |  |  |  |  |  |  |  |  |  |  |  |  |  |  |  |  |  |  |  |  |  |  |  |  |  |  |  |  |  |  |  |  |  |  |  |  |  |  |  |  |  |  |  |  |  |  |  |  |  |  |  |  |  |  |  |  |  |  |  |  |  |  |  |  |  |  |  |  |  |  |  |  |  |  |  |  |  |  |  |  |  |  |  |  |  |  |  |  |  |  |  |  |  |  |  |  |  |  |  |  |  |  |  |  |  |  |  |  |  |  |  |  |  |  |  |  |  |  |  |  |  |  |  |  |  |  |  |  |  |  |  |  |  |  |  |  |  |  |  |  |  |  |  |  |  |  |  |
|                                                                               | Stratigraphy                                             | Stationary thermal transmittance U = W/m²K | Periodic thermal transmittance Yie = W/m²K | Thickness cm | Code | Thickness cm | Stationary thermal transmittance U = W/m²K | Periodic thermal transmittance Yie = W/m²K | Thickness cm | A-B 0,38 | C 0,30               | D 0,26 | E 0,23                       | F 0,22            | Yie < 0,10 W/m²K | fa < 0,6                                         | φ > 6 h | Cip ≥ 40 kJ/m²K |  |                                   |                                              |  |  |  |  |  |  |  |  |                                                |  |  |  |  |                |  |  |  |  |  |  |  |  |  |  |  |  |  |  |  |  |  |  |  |  |  |  |  |  |  |  |  |  |  |  |  |  |  |  |  |  |  |  |  |  |  |  |  |  |  |  |  |  |  |  |  |  |  |  |  |  |  |  |  |  |  |  |  |  |  |  |  |  |  |  |  |  |  |  |  |  |  |  |  |  |  |  |  |  |  |  |  |  |  |  |  |  |  |  |  |  |  |  |  |  |  |  |  |  |  |  |  |  |  |  |  |  |  |  |  |  |  |  |  |  |  |  |  |  |  |  |  |  |  |  |  |  |  |  |  |  |  |  |  |  |  |  |  |  |  |  |  |  |  |  |  |  |  |  |  |  |  |  |  |  |  |  |  |  |  |  |  |  |  |  |  |  |  |  |  |  |  |  |  |  |  |  |  |  |  |  |  |  |  |  |  |  |  |  |  |  |  |  |  |  |  |  |  |  |  |  |  |  |  |  |  |  |  |  |  |  |  |  |  |  |  |  |  |  |  |  |  |  |  |  |  |  |  |  |  |  |  |  |  |  |  |  |  |  |  |  |  |  |  |  |  |  |  |  |  |  |  |  |  |  |  |  |  |  |  |  |  |  |  |  |  |  |  |  |  |  |  |  |  |  |  |  |  |  |  |  |  |  |  |  |  |  |  |  |  |  |  |  |  |  |  |  |  |  |  |  |  |  |  |  |  |  |  |  |  |  |  |  |  |  |  |  |  |  |  |  |  |  |  |  |  |  |  |  |  |  |  |  |  |  |  |  |  |  |  |  |  |  |  |  |  |  |  |  |  |  |  |  |  |  |  |  |  |  |  |  |  |  |  |  |  |  |  |  |  |  |  |  |  |  |  |  |  |  |  |  |  |  |  |  |  |  |  |  |  |  |  |  |  |  |  |  |  |  |  |  |  |  |  |  |  |  |  |  |  |  |  |  |  |  |  |  |  |  |  |  |  |  |  |  |  |  |  |  |  |  |  |  |  |  |  |  |  |  |  |  |  |  |  |  |  |  |  |  |  |  |  |  |  |  |  |  |  |  |  |  |  |  |  |  |  |  |  |  |  |  |  |  |  |  |  |  |  |  |  |  |  |  |  |  |  |  |  |  |  |  |  |  |  |  |  |  |  |  |  |  |  |  |  |  |  |  |  |  |  |  |  |  |  |
| PS.01                                                                         | x                                                        |                                            |                                            |              |      |              |                                            |                                            |              |          |                      |        |                              |                   |                  |                                                  |         |                 |  |                                   |                                              |  |  |  |  |  |  |  |  |                                                |  |  |  |  |                |  |  |  |  |  |  |  |  |  |  |  |  |  |  |  |  |  |  |  |  |  |  |  |  |  |  |  |  |  |  |  |  |  |  |  |  |  |  |  |  |  |  |  |  |  |  |  |  |  |  |  |  |  |  |  |  |  |  |  |  |  |  |  |  |  |  |  |  |  |  |  |  |  |  |  |  |  |  |  |  |  |  |  |  |  |  |  |  |  |  |  |  |  |  |  |  |  |  |  |  |  |  |  |  |  |  |  |  |  |  |  |  |  |  |  |  |  |  |  |  |  |  |  |  |  |  |  |  |  |  |  |  |  |  |  |  |  |  |  |  |  |  |  |  |  |  |  |  |  |  |  |  |  |  |  |  |  |  |  |  |  |  |  |  |  |  |  |  |  |  |  |  |  |  |  |  |  |  |  |  |  |  |  |  |  |  |  |  |  |  |  |  |  |  |  |  |  |  |  |  |  |  |  |  |  |  |  |  |  |  |  |  |  |  |  |  |  |  |  |  |  |  |  |  |  |  |  |  |  |  |  |  |  |  |  |  |  |  |  |  |  |  |  |  |  |  |  |  |  |  |  |  |  |  |  |  |  |  |  |  |  |  |  |  |  |  |  |  |  |  |  |  |  |  |  |  |  |  |  |  |  |  |  |  |  |  |  |  |  |  |  |  |  |  |  |  |  |  |  |  |  |  |  |  |  |  |  |  |  |  |  |  |  |  |  |  |  |  |  |  |  |  |  |  |  |  |  |  |  |  |  |  |  |  |  |  |  |  |  |  |  |  |  |  |  |  |  |  |  |  |  |  |  |  |  |  |  |  |  |  |  |  |  |  |  |  |  |  |  |  |  |  |  |  |  |  |  |  |  |  |  |  |  |  |  |  |  |  |  |  |  |  |  |  |  |  |  |  |  |  |  |  |  |  |  |  |  |  |  |  |  |  |  |  |  |  |  |  |  |  |  |  |  |  |  |  |  |  |  |  |  |  |  |  |  |  |  |  |  |  |  |  |  |  |  |  |  |  |  |  |  |  |  |  |  |  |  |  |  |  |  |  |  |  |  |  |  |  |  |  |  |  |  |  |  |  |  |  |  |  |  |  |  |  |  |  |  |  |  |  |  |  |  |  |  |  |  |  |  |  |  |  |  |  |  |  |  |  |  |  |  |  |  |  |  |  |  |  |  |

| Efficiency solutions matrix applicable on national residential building stock |                             |                     |                     |                     |                     |                     |               |                           |        |        |                                              |          |                |                   |       |                         |                                                                |      |                                   |       |              |                                                     |                                                     |                 |      |                 |                                                     |                                                     |                                                |             |           |           |           |                |                     |          |            |                    |   |   |   |   |   |
|-------------------------------------------------------------------------------|-----------------------------|---------------------|---------------------|---------------------|---------------------|---------------------|---------------|---------------------------|--------|--------|----------------------------------------------|----------|----------------|-------------------|-------|-------------------------|----------------------------------------------------------------|------|-----------------------------------|-------|--------------|-----------------------------------------------------|-----------------------------------------------------|-----------------|------|-----------------|-----------------------------------------------------|-----------------------------------------------------|------------------------------------------------|-------------|-----------|-----------|-----------|----------------|---------------------|----------|------------|--------------------|---|---|---|---|---|
| N. Sheet                                                                      | Class of construction age   |                     |                     |                     |                     |                     |               | Building type             |        |        |                                              |          |                | Construction type |       |                         |                                                                |      | Building envelope characteristics |       |              |                                                     |                                                     |                 |      |                 |                                                     |                                                     | Limit values verification by current standards |             |           |           |           |                |                     |          |            |                    |   |   |   |   |   |
|                                                                               |                             |                     |                     |                     |                     |                     |               |                           |        |        |                                              |          |                |                   |       |                         |                                                                |      |                                   |       |              |                                                     |                                                     |                 |      |                 |                                                     |                                                     | Winter regimen                                 |             |           |           |           | Summer regimen |                     |          |            |                    |   |   |   |   |   |
|                                                                               | Climate zones applicability |                     |                     |                     |                     |                     |               |                           |        |        | Satisfying quality and performance standards |          |                |                   |       |                         |                                                                |      |                                   |       |              |                                                     |                                                     |                 |      |                 |                                                     |                                                     |                                                |             |           |           |           |                |                     |          |            |                    |   |   |   |   |   |
|                                                                               | Limit values [W/m²K]        |                     |                     |                     |                     |                     |               |                           |        |        |                                              |          |                |                   |       |                         |                                                                |      |                                   |       |              |                                                     |                                                     |                 |      |                 |                                                     |                                                     |                                                |             |           |           |           |                |                     |          |            |                    |   |   |   |   |   |
| 1. Until the 1900                                                             | 2.from 1901 to 1920         | 3.from 1921 to 1945 | 4.from 1946 to 1960 | 5.from 1961 to 1975 | 6.from 1976 to 1990 | 7.from 1991 to 2005 | 8. After 2005 | Isolated<br>Single-family | Duplex | Linear | Tower                                        | Terraced | Balcony access | Building          | Block | Load bearing<br>masonry | Stone and brick<br>Clay-<br>brick/block<br>Reinforced concrete | Wood | Reinforced concrete               | Steel | Stratigraphy | Stationary<br>thermal<br>transmittance<br>U = W/m²K | Periodic<br>thermal<br>transmittance<br>Yie = W/m²K | Thickness<br>cm | Code | Thickness<br>cm | Stationary<br>thermal<br>transmittance<br>U = W/m²K | Periodic<br>thermal<br>transmittance<br>Yie = W/m²K | Thickness<br>cm                                | A-B<br>0,38 | C<br>0,30 | D<br>0,26 | E<br>0,23 | F<br>0,22      | Yie < 0,10<br>W/m²K | fa < 0,6 | φ > 6<br>h | Cip ≥ 40<br>kJ/m²K |   |   |   |   |   |
| PS.08                                                                         |                             | x                   |                     |                     |                     |                     |               | x                         |        | x      |                                              | x        | x              |                   | x     | x                       |                                                                |      |                                   |       |              | 1,305                                               | 0,229                                               | 34              | CI.1 | 13,7            | 0,220                                               | 0,008                                               | 47,7                                           | x           | x         | x         | x         | x              | x                   | x        | x          | x                  | x | x | x | x | x |
|                                                                               | CI.2                        | 16                  | 0,230               | 0,005               | 50                  | x                   | x             | x                         | x      | x      |                                              | x        | x              | x                 | x     | x                       | x                                                              | x    | x                                 | x     |              |                                                     |                                                     |                 | x    | x               | x                                                   | x                                                   | x                                              | x           | x         | x         | x         | x              | x                   | x        | x          | x                  | x | x |   |   |   |
|                                                                               | VWS.1                       | 14                  | 0,218               | 0,007               | 48                  | x                   | x             | x                         | x      | x      | x                                            | x        | x              | x                 | x     | x                       | x                                                              | x    | x                                 | x     |              |                                                     |                                                     |                 | x    | x               | x                                                   | x                                                   | x                                              | x           | x         | x         | x         | x              | x                   | x        | x          | x                  | x | x |   |   |   |
|                                                                               | VWS.2                       | 19,2                | 0,212               | 0,007               | 53,2                | x                   | x             | x                         | x      | x      | x                                            | x        | x              | x                 | x     | x                       | x                                                              | x    | x                                 | x     |              |                                                     |                                                     |                 | x    | x               | x                                                   | x                                                   | x                                              | x           | x         | x         | x         | x              | x                   | x        | x          | x                  | x | x |   |   |   |
|                                                                               | IIS.1                       | 6,5                 | 0,241               | 0,012               | 40,5                | x                   | x             | x                         |        |        |                                              |          |                |                   |       |                         |                                                                |      |                                   |       |              |                                                     |                                                     |                 |      |                 |                                                     |                                                     |                                                |             |           |           |           |                |                     |          |            |                    |   |   |   |   |   |
|                                                                               | IIS.2                       | 11,8                | 0,246               | 0,015               | 45,8                | x                   | x             | x                         |        |        |                                              |          |                |                   |       |                         |                                                                |      |                                   |       |              |                                                     |                                                     |                 |      |                 |                                                     |                                                     |                                                |             |           |           |           |                |                     |          |            |                    |   |   |   |   |   |
|                                                                               |                             |                     |                     |                     |                     |                     |               |                           |        |        |                                              |          |                |                   |       |                         |                                                                |      |                                   |       |              |                                                     |                                                     |                 |      |                 |                                                     |                                                     |                                                |             |           |           |           |                |                     |          |            |                    |   |   |   |   |   |
| PS.09                                                                         |                             | x                   |                     |                     |                     |                     |               | x                         |        | x      |                                              | x        | x              |                   | x     | x                       |                                                                |      |                                   |       |              | 0,893                                               | 0,023                                               | 55              | CI.1 | 13,7            | 0,203                                               | 0,001                                               | 68,7                                           | x           | x         | x         | x         | x              | x                   | x        | x          | x                  | x | x | x | x | x |
|                                                                               | CI.2                        | 16                  | 0,211               | 0,001               | 71                  | x                   | x             | x                         | x      | x      | x                                            | x        | x              | x                 | x     | x                       | x                                                              | x    | x                                 | x     |              |                                                     |                                                     |                 | x    | x               | x                                                   | x                                                   | x                                              | x           | x         | x         | x         | x              | x                   | x        | x          | x                  | x |   |   |   |   |
|                                                                               | VWS.1                       | 14                  | 0,202               | 0,001               | 69                  | x                   | x             | x                         | x      | x      | x                                            | x        | x              | x                 | x     | x                       | x                                                              | x    | x                                 | x     |              |                                                     |                                                     |                 | x    | x               | x                                                   | x                                                   | x                                              | x           | x         | x         | x         | x              | x                   | x        | x          | x                  | x | x |   |   |   |
|                                                                               | VWS.2                       | 19,2                | 0,196               | 0,001               | 74,2                | x                   | x             | x                         | x      | x      | x                                            | x        | x              | x                 | x     | x                       | x                                                              | x    | x                                 | x     |              |                                                     |                                                     |                 | x    | x               | x                                                   | x                                                   | x                                              | x           | x         | x         | x         | x              | x                   | x        | x          | x                  | x | x |   |   |   |
|                                                                               | IIS.1                       | 6,5                 | 0,220               | 0,001               | 61,5                | x                   | x             | x                         | x      | x      | x                                            | x        | x              | x                 | x     | x                       | x                                                              | x    | x                                 | x     |              |                                                     |                                                     |                 | x    | x               | x                                                   | x                                                   | x                                              | x           | x         | x         | x         | x              | x                   | x        | x          | x                  | x | x |   |   |   |
|                                                                               | IIS.2                       | 11,8                | 0,225               | 0,002               | 66,8                | x                   | x             | x                         | x      | x      | x                                            | x        | x              | x                 | x     | x                       | x                                                              | x    | x                                 | x     |              |                                                     |                                                     |                 | x    | x               | x                                                   | x                                                   | x                                              | x           | x         | x         | x         | x              | x                   | x        | x          | x                  | x | x | x |   |   |
|                                                                               |                             |                     |                     |                     |                     |                     |               |                           |        |        |                                              |          |                |                   |       |                         |                                                                |      |                                   |       |              |                                                     |                                                     |                 |      |                 |                                                     |                                                     |                                                |             |           |           |           |                |                     |          |            |                    |   |   |   |   |   |
| PS.10                                                                         |                             | x                   |                     |                     |                     |                     |               | x                         |        | x      |                                              | x        | x              |                   | x     | x                       |                                                                |      |                                   |       |              | 2,202                                               | 0,144                                               | 60              | CI.1 | 13,7            | 0,236                                               | 0,003                                               | 73,7                                           | x           | x         | x         |           |                |                     | x        | x          | x                  | x | x | x | x |   |
|                                                                               | CI.2                        | 16                  | 0,248               | 0,002               | 76                  | x                   | x             | x                         |        |        |                                              | x        | x              | x                 |       |                         |                                                                | x    | x                                 | x     |              |                                                     |                                                     |                 | x    | x               | x                                                   | x                                                   | x                                              | x           | x         | x         | x         | x              | x                   | x        | x          | x                  | x |   |   |   |   |
|                                                                               | VWS.1                       | 14                  | 0,234               | 0,003               | 74                  | x                   | x             | x                         |        |        |                                              | x        | x              | x                 |       |                         |                                                                | x    | x                                 | x     |              |                                                     |                                                     |                 | x    | x               | x                                                   | x                                                   | x                                              | x           | x         | x         | x         | x              | x                   | x        | x          | x                  | x | x |   |   |   |
|                                                                               | VWS.2                       | 19,2                | 0,227               | 0,003               | 79,2                | x                   | x             | x                         |        |        |                                              | x        | x              | x                 |       |                         |                                                                | x    | x                                 | x     |              |                                                     |                                                     |                 | x    | x               | x                                                   | x                                                   | x                                              | x           | x         | x         | x         | x              | x                   | x        | x          | x                  | x | x |   |   |   |
|                                                                               | IIS.1                       | 6,5                 | 0,260               | 0,007               | 66,5                | x                   | x             |                           |        |        |                                              | x        | x              |                   |       |                         |                                                                | x    | x                                 | x     |              |                                                     |                                                     |                 | x    | x               | x                                                   | x                                                   | x                                              | x           | x         | x         | x         | x              | x                   | x        | x          | x                  | x | x |   |   |   |
|                                                                               | IIS.2                       | 11,8                | 0,267               | 0,008               | 71,8                | x                   | x             |                           |        |        |                                              | x        | x              |                   |       |                         |                                                                | x    | x                                 | x     |              |                                                     |                                                     |                 | x    | x               | x                                                   | x                                                   | x                                              | x           | x         | x         | x         | x              | x                   | x        | x          | x                  | x | x |   |   |   |
|                                                                               |                             |                     |                     |                     |                     |                     |               |                           |        |        |                                              |          |                |                   |       |                         |                                                                |      |                                   |       |              |                                                     |                                                     |                 |      |                 |                                                     |                                                     |                                                |             |           |           |           |                |                     |          |            |                    |   |   |   |   |   |
| PS.11                                                                         |                             | x                   |                     |                     |                     |                     |               | x                         |        | x      |                                              | x        | x              |                   | x     | x                       |                                                                |      |                                   |       |              | 1,61                                                | 0,309                                               | 40              | CI.1 | 13,7            | 0,227                                               | 0,010                                               | 53,7                                           | x           | x         | x         |           | x              |                     | x        | x          | x                  | x | x | x |   |   |
|                                                                               | CI.2                        | 16                  | 0,238               | 0,006               | 56                  | x                   | x             | x                         |        |        |                                              | x        | x              | x                 |       |                         |                                                                | x    | x                                 | x     |              |                                                     |                                                     |                 | x    | x               | x                                                   | x                                                   | x                                              | x           | x         | x         | x         | x              | x                   | x        | x          | x                  | x |   |   |   |   |
|                                                                               | VWS.1                       | 14                  | 0,226               | 0,009               | 54                  | x                   | x             | x                         |        | x      |                                              | x        | x              | x                 |       |                         |                                                                | x    | x                                 | x     |              |                                                     |                                                     |                 | x    | x               | x                                                   | x                                                   | x                                              | x           | x         | x         | x         | x              | x                   | x        | x          | x                  | x | x |   |   |   |
|                                                                               | VWS.2                       | 19,2                | 0,218               | 0,008               | 59,2                | x                   | x             | x                         |        | x      |                                              | x        | x              | x                 |       |                         |                                                                | x    | x                                 | x     |              |                                                     |                                                     |                 | x    | x               | x                                                   | x                                                   | x                                              | x           | x         | x         | x         | x              | x                   | x        | x          | x                  | x | x |   |   |   |
|                                                                               | IIS.1                       | 6,5                 | 0,249               | 0,016               | 46,5                | x                   | x             | x                         |        |        |                                              | x        | x              |                   |       |                         |                                                                | x    | x                                 | x     |              |                                                     |                                                     |                 | x    | x               | x                                                   | x                                                   | x                                              | x           | x         | x         | x         | x              | x                   | x        | x          | x                  | x | x |   |   |   |
|                                                                               | IIS.2                       | 11,8                | 0,255               | 0,019               | 51,8                | x                   | x             | x                         |        |        |                                              | x        | x              |                   |       |                         |                                                                | x    | x                                 | x     |              |                                                     |                                                     |                 | x    | x               | x                                                   | x                                                   | x                                              | x           | x         | x         | x         | x              | x                   | x        | x          | x                  | x | x | x |   |   |
|                                                                               |                             |                     |                     |                     |                     |                     |               |                           |        |        |                                              |          |                |                   |       |                         |                                                                |      |                                   |       |              |                                                     |                                                     |                 |      |                 |                                                     |                                                     |                                                |             |           |           |           |                |                     |          |            |                    |   |   |   |   |   |
| PS.12                                                                         |                             | x                   |                     |                     |                     |                     |               | x                         |        | x      |                                              | x        | x              |                   | x     | x                       |                                                                |      |                                   |       |              | 1,19                                                | 0,065                                               | 60              | CI.1 | 13,7            | 0,216                                               | 0,002                                               | 73,7                                           | x           | x         | x         |           | x              |                     | x        | x          | x                  | x | x | x |   |   |
|                                                                               | CI.2                        | 16                  | 0,292               | 0,002               | 76                  | x                   | x             |                           |        |        | x                                            | x        |                |                   |       |                         | x                                                              | x    | x                                 | x     |              |                                                     |                                                     |                 | x    | x               | x                                                   | x                                                   | x                                              | x           | x         | x         | x         | x              | x                   | x        | x          | x                  | x | x |   |   |   |
|                                                                               | VWS.1                       | 14                  | 0,180               | 0,002               | 74                  | x                   | x             | x                         |        | x      |                                              | x        | x              |                   |       |                         | x                                                              | x    | x                                 | x     |              |                                                     |                                                     |                 | x    | x               | x                                                   | x                                                   | x                                              | x           | x         | x         | x         | x              | x                   | x        | x          | x                  | x | x |   |   |   |
|                                                                               | VWS.2                       | 19,2                | 0,240               | 0,002               | 79,2                | x                   | x             | x                         |        |        |                                              | x        | x              |                   |       |                         |                                                                | x    | x                                 | x     |              |                                                     |                                                     |                 | x    | x               | x                                                   | x                                                   | x                                              | x           | x         | x         | x         | x              | x                   | x        | x          | x                  | x | x |   |   |   |
|                                                                               | IIS.1                       | 6,5                 | 0,236               | 0,003               | 66,5                | x                   | x             | x                         |        |        |                                              | x        | x              |                   |       |                         |                                                                | x    | x                                 | x     |              |                                                     |                                                     |                 | x    | x               | x                                                   | x                                                   | x                                              | x           | x         | x         | x         | x              | x                   | x        | x          | x                  | x | x |   |   |   |
|                                                                               | IIS.2                       | 11,8                | 0,242               | 0,004               | 71,8                | x                   | x             | x                         |        |        |                                              | x        | x              |                   |       |                         |                                                                | x    | x                                 | x     |              |                                                     |                                                     |                 | x    | x               | x                                                   | x                                                   | x                                              | x           | x         | x         | x         | x              | x                   | x        | x          | x                  | x | x |   |   |   |
|                                                                               |                             |                     |                     |                     |                     |                     |               |                           |        |        |                                              |          |                |                   |       |                         |                                                                |      |                                   |       |              |                                                     |                                                     |                 |      |                 |                                                     |                                                     |                                                |             |           |           |           |                |                     |          |            |                    |   |   |   |   |   |
| PS.13                                                                         |                             | x                   |                     |                     |                     |                     |               | x                         |        | x      |                                              | x        | x              |                   | x     |                         |                                                                |      |                                   |       |              | 1,95                                                | 0,690                                               | 25              | CI.1 | 13,7            | 0,233                                               | 0,023                                               | 38,7                                           | x           | x         | x         |           |                |                     | x        | x          | x                  | x | x | x |   |   |
|                                                                               | CI.2                        | 16                  | 0,244               | 0,013               | 41                  | x                   | x             | x                         |        |        |                                              | x        | x              | x                 |       |                         |                                                                | x    | x                                 | x     |              |                                                     |                                                     |                 | x    | x               | x                                                   | x                                                   | x                                              | x           | x         | x         | x         | x              | x                   | x        | x          | x                  | x |   |   |   |   |
|                                                                               | VWS.1                       | 14                  | 0,231               | 0,020               | 39                  | x                   | x             | x                         |        |        |                                              | x        | x              | x                 |       |                         |                                                                | x    | x                                 | x     |              |                                                     |                                                     |                 | x    | x               | x                                                   | x                                                   | x                                              | x           | x         | x         | x         |                |                     |          |            |                    |   |   |   |   |   |

| Efficiency solutions matrix applicable on national residential building stock |                             |                     |                     |                     |                     |                     |               |               |                 |                  |                                              |      |                     |                      |              |                                               |                                            |                                   |      |                                                          |                                            |                                            |              |                      |        |                              |        |                                                |                  |          |         |                 |                |                  |          |         |                 |
|-------------------------------------------------------------------------------|-----------------------------|---------------------|---------------------|---------------------|---------------------|---------------------|---------------|---------------|-----------------|------------------|----------------------------------------------|------|---------------------|----------------------|--------------|-----------------------------------------------|--------------------------------------------|-----------------------------------|------|----------------------------------------------------------|--------------------------------------------|--------------------------------------------|--------------|----------------------|--------|------------------------------|--------|------------------------------------------------|------------------|----------|---------|-----------------|----------------|------------------|----------|---------|-----------------|
| N. Sheet                                                                      | Class of construction age   |                     |                     |                     |                     |                     |               | Building type |                 |                  |                                              |      |                     | Construction type    |              |                                               |                                            | Building envelope characteristics |      |                                                          |                                            |                                            |              |                      |        |                              |        | Limit values verification by current standards |                  |          |         |                 |                |                  |          |         |                 |
|                                                                               |                             |                     |                     |                     |                     |                     |               |               |                 |                  |                                              |      |                     |                      |              |                                               |                                            |                                   |      |                                                          |                                            |                                            |              |                      |        |                              |        | Winter regimen                                 |                  |          |         |                 | Summer regimen |                  |          |         |                 |
|                                                                               | Climate zones applicability |                     |                     |                     |                     |                     |               |               |                 |                  | Satisfying quality and performance standards |      |                     |                      |              |                                               |                                            |                                   |      |                                                          |                                            |                                            |              |                      |        |                              |        |                                                |                  |          |         |                 |                |                  |          |         |                 |
|                                                                               | Limit values [W/m²K]        |                     |                     |                     |                     |                     |               |               |                 |                  | Yie < 0,10 W/m²K                             |      |                     |                      |              | fa < 0,6                                      |                                            |                                   |      |                                                          | φ > 6 h                                    |                                            |              |                      |        | Cip ≥ 40 kJ/m²K              |        |                                                |                  |          |         |                 |                |                  |          |         |                 |
| 1. Until the 1900                                                             | 2.from 1901 to 1920         | 3.from 1921 to 1945 | 4.from 1946 to 1960 | 5.from 1961 to 1975 | 6.from 1976 to 1990 | 7.from 1991 to 2005 | 8. After 2005 | Isolated      | Aggregated      |                  |                                              |      |                     | Load bearing masonry |              |                                               | Frame structure                            |                                   |      | Vertical closures of national residential building stock |                                            |                                            |              | Efficiency solutions |        | Vertical closure Post operam |        |                                                | A-B 0,38         | C 0,30   | D 0,26  | E 0,23          | F 0,22         | Yie < 0,10 W/m²K | fa < 0,6 | φ > 6 h | Cip ≥ 40 kJ/m²K |
| Single-family                                                                 | Duplex                      | Linear              | Tower               | Terraced            | Balcony access      | Building            | Block         | Stone         | Stone and brick | Clay-brick/block | Reinforced concrete                          | Wood | Reinforced concrete | Steel                | Stratigraphy | Stationary thermal transmittance U = W/m²K    | Periodic thermal transmittance Yie = W/m²K | Thickness cm                      | Code | Thickness cm                                             | Stationary thermal transmittance U = W/m²K | Periodic thermal transmittance Yie = W/m²K | Thickness cm | A-B 0,38             | C 0,30 | D 0,26                       | E 0,23 | F 0,22                                         | Yie < 0,10 W/m²K | fa < 0,6 | φ > 6 h | Cip ≥ 40 kJ/m²K |                |                  |          |         |                 |
| PS.15                                                                         |                             | x                   |                     |                     |                     |                     |               | x             |                 | x                |                                              | x    | x                   |                      |              | VC.07 - Solid brick masonry (50 cm)           | 1,16                                       | 0,063                             | 50   | Cl.1                                                     | 13,7                                       | 0,215                                      | 0,002        | 63,7                 | x      | x                            | x      | x                                              | x                | x        | x       | x               | x              |                  |          |         |                 |
|                                                                               |                             |                     |                     |                     |                     |                     |               |               |                 |                  |                                              |      |                     |                      |              |                                               |                                            |                                   |      |                                                          |                                            |                                            |              |                      |        |                              |        |                                                |                  |          |         |                 |                |                  |          |         |                 |
|                                                                               |                             |                     |                     |                     |                     |                     |               |               |                 |                  |                                              |      |                     |                      |              |                                               |                                            |                                   |      |                                                          |                                            |                                            |              |                      |        |                              |        |                                                |                  |          |         |                 |                |                  |          |         |                 |
|                                                                               |                             |                     |                     |                     |                     |                     |               |               |                 |                  |                                              |      |                     |                      |              |                                               |                                            |                                   |      |                                                          |                                            |                                            |              |                      |        |                              |        |                                                |                  |          |         |                 |                |                  |          |         |                 |
|                                                                               |                             |                     |                     |                     |                     |                     |               |               |                 |                  |                                              |      |                     |                      |              |                                               |                                            |                                   |      |                                                          |                                            |                                            |              |                      |        |                              |        |                                                |                  |          |         |                 |                |                  |          |         |                 |
|                                                                               |                             |                     |                     |                     |                     |                     |               |               |                 |                  |                                              |      |                     |                      |              |                                               |                                            |                                   |      |                                                          |                                            |                                            |              |                      |        |                              |        |                                                |                  |          |         |                 |                |                  |          |         |                 |
|                                                                               |                             |                     |                     |                     |                     |                     |               |               |                 |                  |                                              |      |                     |                      |              |                                               |                                            |                                   |      |                                                          |                                            |                                            |              |                      |        |                              |        |                                                |                  |          |         |                 |                |                  |          |         |                 |
| PS.16                                                                         |                             | x                   |                     |                     |                     |                     |               | x             |                 | x                |                                              | x    | x                   |                      |              | VC.08 - Solid brick masonry (62 cm)           | 0,97                                       | 0,020                             | 62   | Cl.1                                                     | 13,7                                       | 0,208                                      | 0,001        | 75,7                 | x      | x                            | x      | x                                              | x                | x        | x       | x               | x              |                  |          |         |                 |
|                                                                               |                             |                     |                     |                     |                     |                     |               |               |                 |                  |                                              |      |                     |                      |              |                                               |                                            |                                   |      |                                                          |                                            |                                            |              |                      |        |                              |        |                                                |                  |          |         |                 |                |                  |          |         |                 |
|                                                                               |                             |                     |                     |                     |                     |                     |               |               |                 |                  |                                              |      |                     |                      |              |                                               |                                            |                                   |      |                                                          |                                            |                                            |              |                      |        |                              |        |                                                |                  |          |         |                 |                |                  |          |         |                 |
|                                                                               |                             |                     |                     |                     |                     |                     |               |               |                 |                  |                                              |      |                     |                      |              |                                               |                                            |                                   |      |                                                          |                                            |                                            |              |                      |        |                              |        |                                                |                  |          |         |                 |                |                  |          |         |                 |
|                                                                               |                             |                     |                     |                     |                     |                     |               |               |                 |                  |                                              |      |                     |                      |              |                                               |                                            |                                   |      |                                                          |                                            |                                            |              |                      |        |                              |        |                                                |                  |          |         |                 |                |                  |          |         |                 |
|                                                                               |                             |                     |                     |                     |                     |                     |               |               |                 |                  |                                              |      |                     |                      |              |                                               |                                            |                                   |      |                                                          |                                            |                                            |              |                      |        |                              |        |                                                |                  |          |         |                 |                |                  |          |         |                 |
|                                                                               |                             |                     |                     |                     |                     |                     |               |               |                 |                  |                                              |      |                     |                      |              |                                               |                                            |                                   |      |                                                          |                                            |                                            |              |                      |        |                              |        |                                                |                  |          |         |                 |                |                  |          |         |                 |
| PS.17                                                                         |                             |                     | x                   |                     |                     |                     |               | x             |                 | x                |                                              | x    | x                   |                      |              | VC.01.1 - Plastered tuff masonry (34 cm)      | 1,305                                      | 0,229                             | 34   | Cl.1                                                     | 13,7                                       | 0,220                                      | 0,008        | 47,7                 | x      | x                            | x      | x                                              | x                | x        | x       | x               | x              |                  |          |         |                 |
|                                                                               |                             |                     |                     |                     |                     |                     |               |               |                 |                  |                                              |      |                     |                      |              |                                               |                                            |                                   |      |                                                          |                                            |                                            |              |                      |        |                              |        |                                                |                  |          |         |                 |                |                  |          |         |                 |
|                                                                               |                             |                     |                     |                     |                     |                     |               |               |                 |                  |                                              |      |                     |                      |              |                                               |                                            |                                   |      |                                                          |                                            |                                            |              |                      |        |                              |        |                                                |                  |          |         |                 |                |                  |          |         |                 |
|                                                                               |                             |                     |                     |                     |                     |                     |               |               |                 |                  |                                              |      |                     |                      |              |                                               |                                            |                                   |      |                                                          |                                            |                                            |              |                      |        |                              |        |                                                |                  |          |         |                 |                |                  |          |         |                 |
|                                                                               |                             |                     |                     |                     |                     |                     |               |               |                 |                  |                                              |      |                     |                      |              |                                               |                                            |                                   |      |                                                          |                                            |                                            |              |                      |        |                              |        |                                                |                  |          |         |                 |                |                  |          |         |                 |
|                                                                               |                             |                     |                     |                     |                     |                     |               |               |                 |                  |                                              |      |                     |                      |              |                                               |                                            |                                   |      |                                                          |                                            |                                            |              |                      |        |                              |        |                                                |                  |          |         |                 |                |                  |          |         |                 |
|                                                                               |                             |                     |                     |                     |                     |                     |               |               |                 |                  |                                              |      |                     |                      |              |                                               |                                            |                                   |      |                                                          |                                            |                                            |              |                      |        |                              |        |                                                |                  |          |         |                 |                |                  |          |         |                 |
| PS.18                                                                         |                             |                     | x                   |                     |                     |                     |               | x             |                 | x                |                                              | x    | x                   |                      |              | VC.01.2 - Plastered tuff masonry (55 cm)      | 0,893                                      | 0,023                             | 55   | Cl.1                                                     | 13,7                                       | 0,203                                      | 0,001        | 68,7                 | x      | x                            | x      | x                                              | x                | x        | x       | x               | x              |                  |          |         |                 |
|                                                                               |                             |                     |                     |                     |                     |                     |               |               |                 |                  |                                              |      |                     |                      |              |                                               |                                            |                                   |      |                                                          |                                            |                                            |              |                      |        |                              |        |                                                |                  |          |         |                 |                |                  |          |         |                 |
|                                                                               |                             |                     |                     |                     |                     |                     |               |               |                 |                  |                                              |      |                     |                      |              |                                               |                                            |                                   |      |                                                          |                                            |                                            |              |                      |        |                              |        |                                                |                  |          |         |                 |                |                  |          |         |                 |
|                                                                               |                             |                     |                     |                     |                     |                     |               |               |                 |                  |                                              |      |                     |                      |              |                                               |                                            |                                   |      |                                                          |                                            |                                            |              |                      |        |                              |        |                                                |                  |          |         |                 |                |                  |          |         |                 |
|                                                                               |                             |                     |                     |                     |                     |                     |               |               |                 |                  |                                              |      |                     |                      |              |                                               |                                            |                                   |      |                                                          |                                            |                                            |              |                      |        |                              |        |                                                |                  |          |         |                 |                |                  |          |         |                 |
|                                                                               |                             |                     |                     |                     |                     |                     |               |               |                 |                  |                                              |      |                     |                      |              |                                               |                                            |                                   |      |                                                          |                                            |                                            |              |                      |        |                              |        |                                                |                  |          |         |                 |                |                  |          |         |                 |
|                                                                               |                             |                     |                     |                     |                     |                     |               |               |                 |                  |                                              |      |                     |                      |              |                                               |                                            |                                   |      |                                                          |                                            |                                            |              |                      |        |                              |        |                                                |                  |          |         |                 |                |                  |          |         |                 |
| PS.19                                                                         |                             |                     | x                   |                     |                     |                     |               | x             |                 | x                |                                              | x    | x                   |                      |              | VC.03 - Brick-lined and stone masonry (40 cm) | 1,61                                       | 0,309                             | 40   | Cl.1                                                     | 13,7                                       | 0,227                                      | 0,010        | 53,7                 | x      | x                            | x      | x                                              | x                | x        | x       | x               | x              |                  |          |         |                 |
|                                                                               |                             |                     |                     |                     |                     |                     |               |               |                 |                  |                                              |      |                     |                      |              |                                               |                                            |                                   |      |                                                          |                                            |                                            |              |                      |        |                              |        |                                                |                  |          |         |                 |                |                  |          |         |                 |
|                                                                               |                             |                     |                     |                     |                     |                     |               |               |                 |                  |                                              |      |                     |                      |              |                                               |                                            |                                   |      |                                                          |                                            |                                            |              |                      |        |                              |        |                                                |                  |          |         |                 |                |                  |          |         |                 |
|                                                                               |                             |                     |                     |                     |                     |                     |               |               |                 |                  |                                              |      |                     |                      |              |                                               |                                            |                                   |      |                                                          |                                            |                                            |              |                      |        |                              |        |                                                |                  |          |         |                 |                |                  |          |         |                 |
|                                                                               |                             |                     |                     |                     |                     |                     |               |               |                 |                  |                                              |      |                     |                      |              |                                               |                                            |                                   |      |                                                          |                                            |                                            |              |                      |        |                              |        |                                                |                  |          |         |                 |                |                  |          |         |                 |
|                                                                               |                             |                     |                     |                     |                     |                     |               |               |                 |                  |                                              |      |                     |                      |              |                                               |                                            |                                   |      |                                                          |                                            |                                            |              |                      |        |                              |        |                                                |                  |          |         |                 |                |                  |          |         |                 |
|                                                                               |                             |                     |                     |                     |                     |                     |               |               |                 |                  |                                              |      |                     |                      |              |                                               |                                            |                                   |      |                                                          |                                            |                                            |              |                      |        |                              |        |                                                |                  |          |         |                 |                |                  |          |         |                 |
| PS.20                                                                         |                             |                     | x                   |                     |                     |                     |               | x             |                 | x                |                                              | x    | x                   |                      |              | VC.04 - Brick-lined and stone masonry (60 cm) | 1,19                                       | 0,065                             | 60   | Cl.1                                                     | 13,7                                       | 0,216                                      | 0,002        | 73,7                 | x      | x                            | x      | x                                              | x                | x        | x       | x               | x              |                  |          |         |                 |
|                                                                               |                             |                     |                     |                     |                     |                     |               |               |                 |                  |                                              |      |                     |                      |              |                                               |                                            |                                   |      |                                                          |                                            |                                            |              |                      |        |                              |        |                                                |                  |          |         |                 |                |                  |          |         |                 |



[illegible]

[illegible]







[illegible]



[illegible]

[illegible]
